# Supplementary material for: Dr.seq2: A quality control and analysis pipeline for parallel single cell transcriptome and epigenome data
Source: PubMed Central journal article supplement (PMC5495495; doi:10.1371/journal.pone.0180583), 2017-07-03
Supplement: pone.0180583.s005.pdf [file pone.0180583.s005.pdf]

# Dr.seq 2.0 QC and Analysis Summary Report: scATAC

May 19, 2017

## Contents

|          |                                                                                 |           |
|----------|---------------------------------------------------------------------------------|-----------|
| <b>1</b> | <b>Data description</b>                                                         | <b>2</b>  |
| <b>2</b> | <b>Bulk-cell level QC</b>                                                       | <b>3</b>  |
| 2.1      | Reads alignment summary . . . . .                                               | 4         |
| 2.2      | Chromosomal Distribution of Open Regions . . . . .                              | 5         |
| 2.3      | Peaks over Chromosomes . . . . .                                                | 6         |
| 2.4      | Average profile on different genome regions . . . . .                           | 7         |
| 2.5      | Distribution of fragment numbers (excluded fragments in mitochondria) . . . . . | 8         |
| <b>3</b> | <b>Individual-cell level QC</b>                                                 | <b>9</b>  |
| 3.1      | Distribution of peak numbers per cell . . . . .                                 | 10        |
| <b>4</b> | <b>Cell-clustering level QC</b>                                                 | <b>11</b> |
| 4.1      | Cell clustering . . . . .                                                       | 12        |
| 4.2      | Silhouette of clustering . . . . .                                              | 13        |
| 4.3      | Clustering heatmap . . . . .                                                    | 14        |
| 4.4      | Ideogram . . . . .                                                              | 15        |
| <b>5</b> | <b>Output list</b>                                                              | <b>16</b> |

# 1 Data description

Table 1 mainly describes the input file and mapping and analysis parameters.

Table 1: Data description

| parameter                                    | value              |
|----------------------------------------------|--------------------|
| output name                                  | scATAC             |
| reads file (file name only)                  | SRR1779659.bam ... |
| fragment length threshold                    | 1500               |
| genome type                                  | hs                 |
| p-value threshold for macs14                 | 1e-5               |
| height of cutting tree                       | 0                  |
| given cluster numbers                        | 3                  |
| limited number of peaks of informative cells | 20                 |
| limited number of cells of informative peaks | 20                 |
| Q30 filter mapped reads                      | True               |

## 2 Bulk-cell level QC

In the bulk-cell level QC step we measured the performance of total scATAC reads. In this step we didn't separate reads, just like treated the sample as bulk ATAC-seq sample.

## 2.1 Reads alignment summary

The following table shows reads number after each filter strategy and mapped reads of final selected reads. It measures the general sequencing quality. Low mappability indicates poor sequence quality (see “Reads level QC”) or library quality (caused by contaminant).

In summary, if the percentage of “total mapped reads” is less than 5%, users may consider reconstruct your library (redo the experiment), but first you should make sure you already trim the adapter and map your reads to the corresponded species (genome version). Mappable reads was after Q30 filtering if Q30 filter function was turned on.

Table 2: Reads alignment summary

| genomic region (Category)    | reads number         |
|------------------------------|----------------------|
| total number of read         | 154,235,698          |
| number of mapped reads       | 86,823,837 (56.29%)* |
| number of mitochondria reads | 19,743,356 (12.8%)*  |

## 2.2 Chromosomal Distribution of Open Regions

The blue bars represent the percentages of the whole tiled or mappable regions in the chromosomes (genome background) and the red bars showed the percentages of the whole open region. These percentages are also marked right next to the bars. P-values for the significance of the relative enrichment of open regions with respect to the genome background are shown in parentheses next to the percentages of the red bars.

Figure 1: Chromosomal Distribution of Open Regions

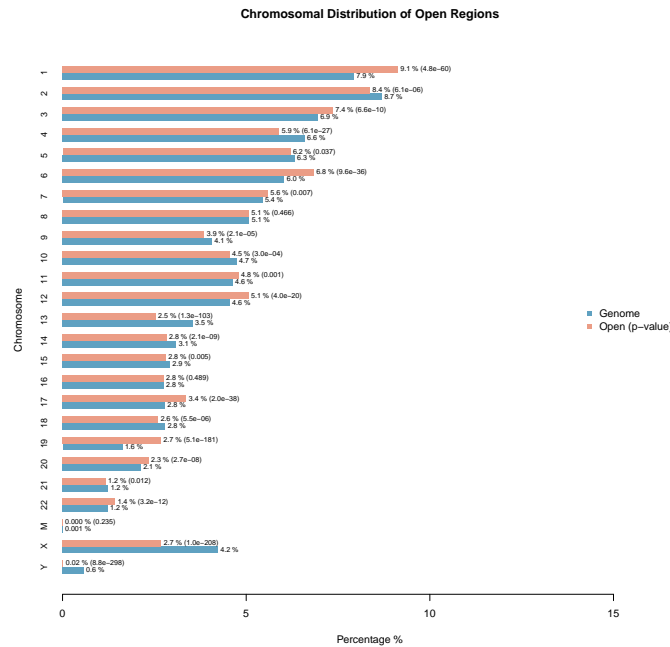

## 2.3 Peaks over Chromosomes

Barplots show open regions distributed over the genome along with their scores or peak heights. The line graph on the top left corner illustrates the distribution of peak heights (or scores). The red bars in the main plot open regions in the input BED file. The x-axis of the main plot represents the actual chromosome sizes.

Figure 2: Peaks over Chromosomes

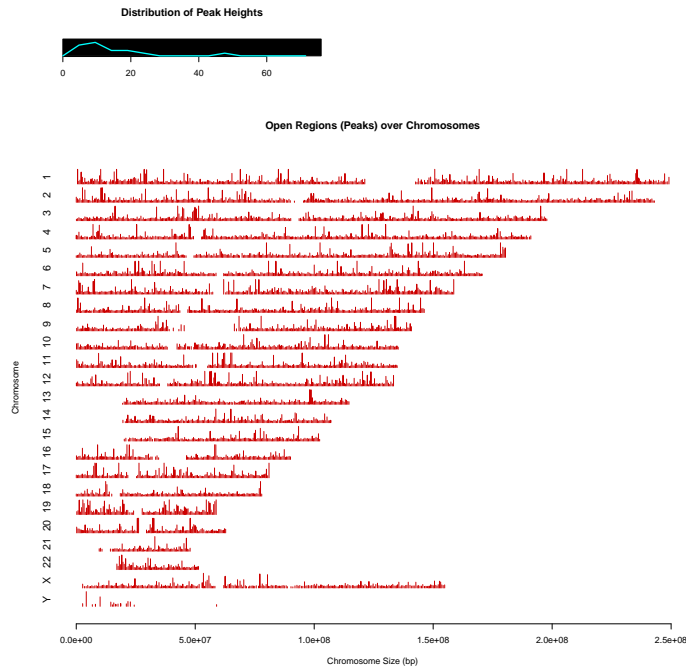

## 2.4 Average profile on different genome regions

Average profiling within/near important genomic features. The panels on the first row display the average enrichment signals around TSS and TTS of genes, respectively. The bottom panel represents the average signals on the meta-gene of 5 kb.

Figure 3: Average profile on different genome regions

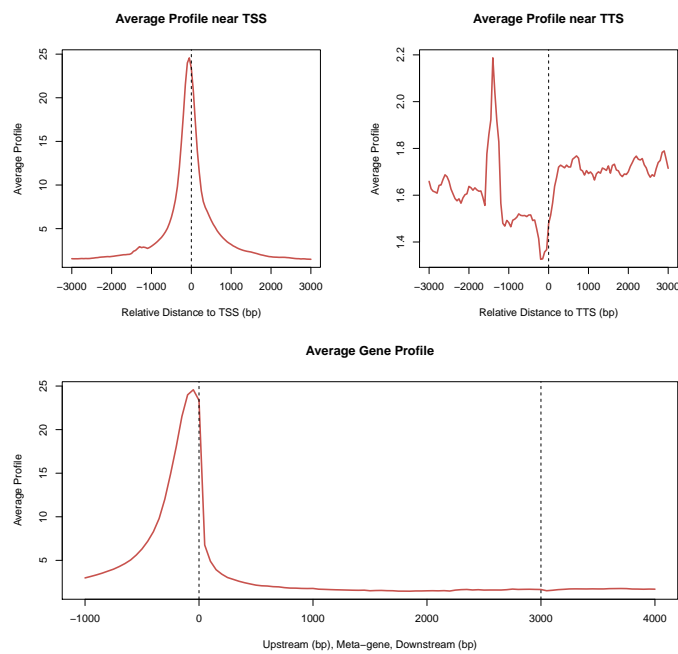

## 2.5 Distribution of fragment numbers (excluded fragments in mitochondria)

ATAC-seq indicated factor occupancy and nucleosome positions with periodicity fragment length distribution.

Figure 4: Distribution of fragment numbers (excluded fragments in mitochondria)

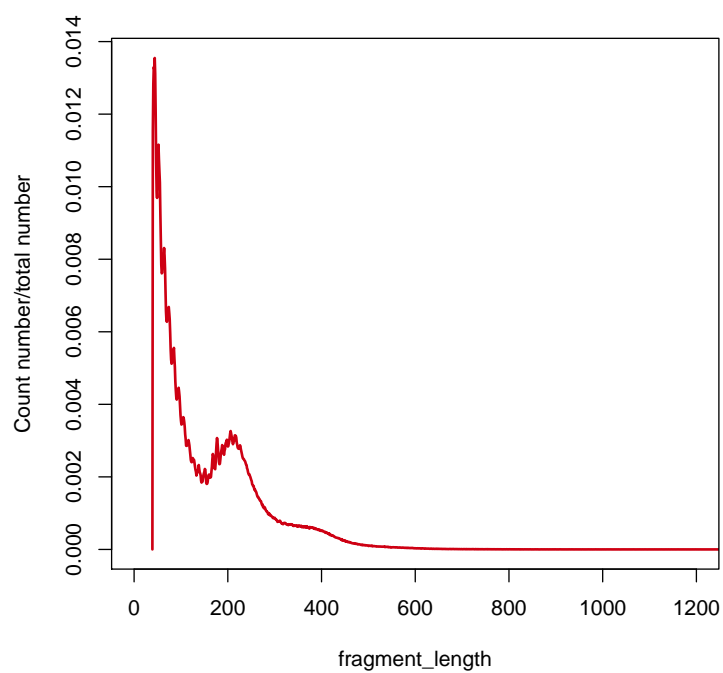



### **3 Individual-cell level QC**

In this step we focused on the quality of individual cell by calculate the number of peak per cell overlapped with combined peaks

### 3.1 Distribution of peak numbers per cell

To measure whether the cell is informative for post-analysis, peak number per each cell is calculated, The cells with small number of peaks indicated the limited informative of cells.

Figure 5: Peak distribution

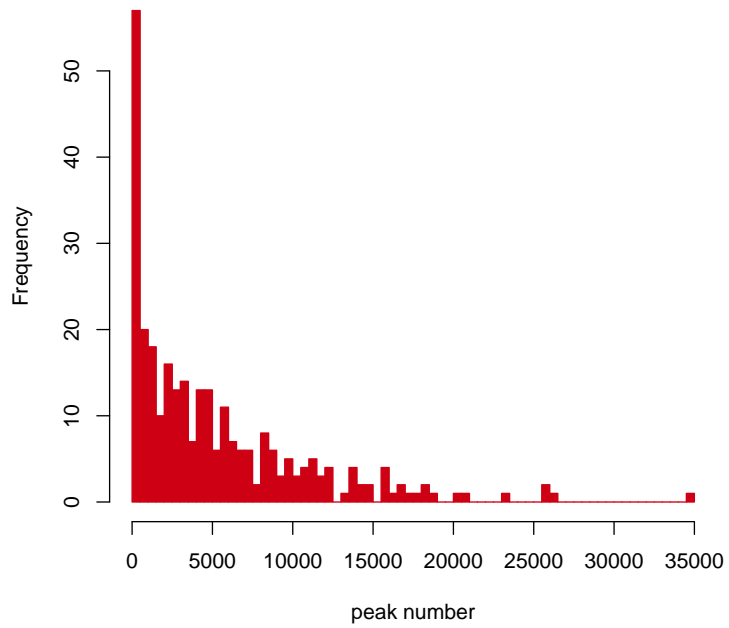

## 4 Cell-clustering level QC

This step composed by h-clustering based on macs14 peaks.

## 4.1 Cell clustering

We conducted a h-cluster based on macs14 peaks to measure sample's ability to be separated to different cell subtypes.

Figure 6: h-clustering based on peak

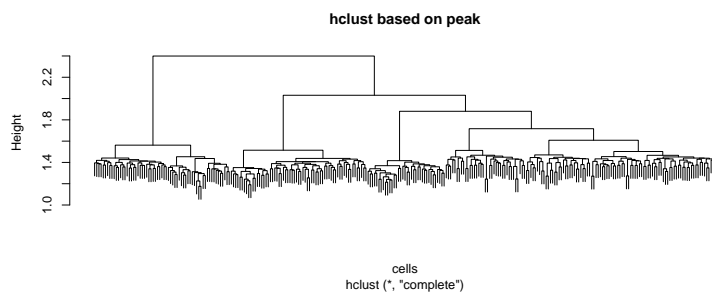

## 4.2 Silhouette of clustering

Silhouette method is used to interpret and validate the consistency within clusters defined in previous steps. A poor Silhouette (e.g. average  $si < 0.2$ ) score indicate that the experiments (if not properly done) may not separate well the subpopulations of cells. If most of your clusters have poor Silhouette score, it may indicate a poor quality of your experiments.

Figure 7: Silhouette score for clustered STAMPs

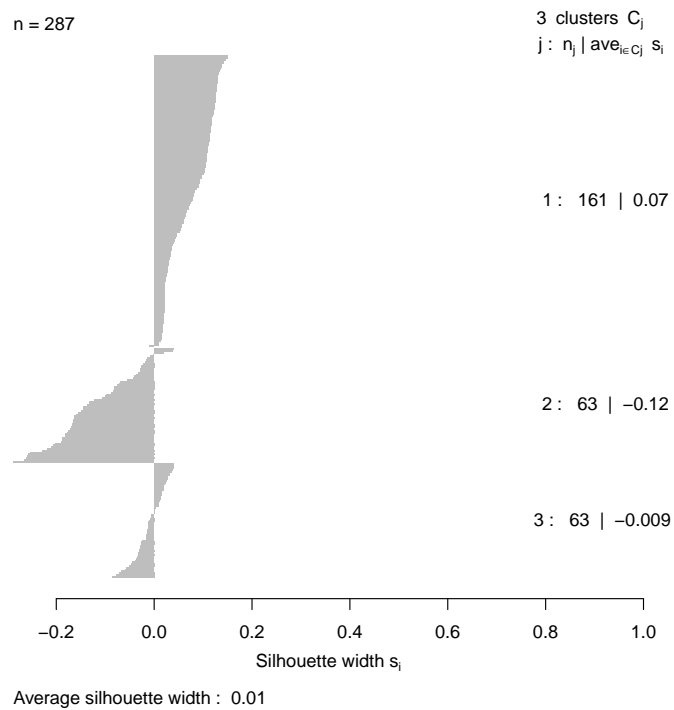

### 4.3 Clustering heatmap

Cell Clustering tree and peak region in each cell. The upper panel represents the hierarchical clustering results based on each single cell. The second panel with different colors represents decision of cell clustering. The bottom two panels (heatmap and color bar) represent the "combined peaks" occupancy of each single cell.

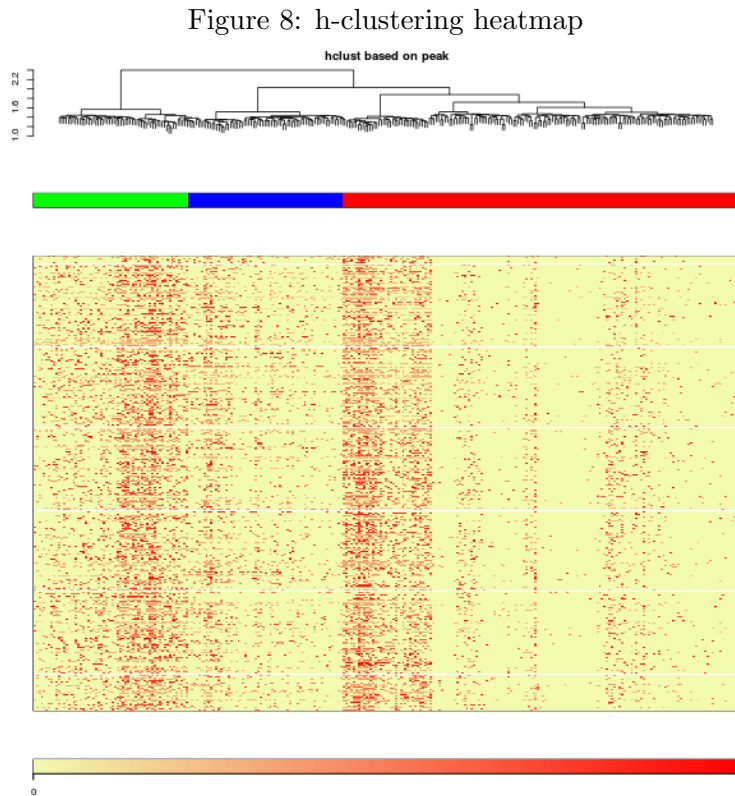

## 4.4 Ideogram

Cluster specific regions were show in each chromosome.

Figure 9: Ideogram of cluster specific regions  
specific region on genomic ideogram

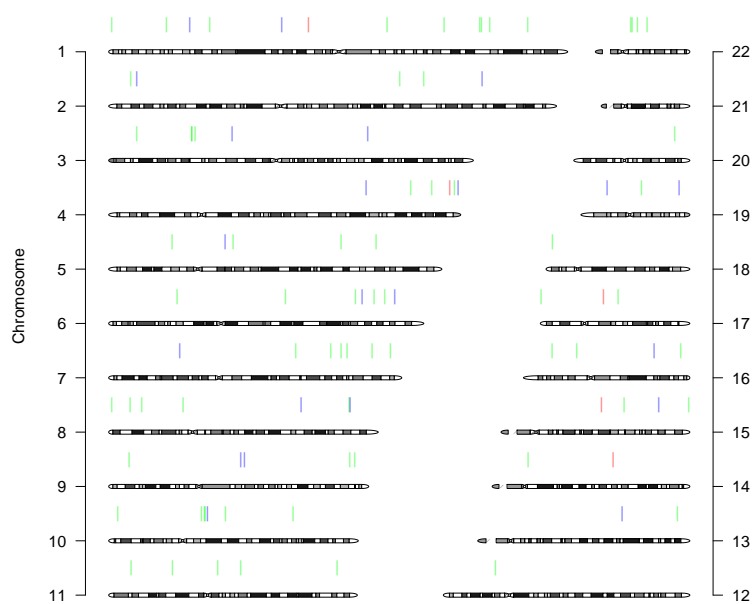

## 5 Output list

All output files were described in the following table

Table 3: output list

| description                                   | filename                                 |
|-----------------------------------------------|------------------------------------------|
| peak location matrix for each cell            | scATACpeakMatrix.txt                     |
| cells in each cluster                         | scATAC_cluster*_cells.txt                |
| cell type specific peaks per each cluster     | scATAC*_specific.peak.bed                |
| cell clustering results with Silhouette Score | scATAC_cluster_with_silhouette_score.txt |
| combined peaks                                | scATAC_peaks.bed                         |
| summary QC report                             | scATAC_summary.pdf                       |
