# Supplementary material for: Dr.seq2: A quality control and analysis pipeline for parallel single cell transcriptome and epigenome data
Source: PLoS One. 2017 Jul 3;12(7):e0180583. doi: 10.1371/journal.pone.0180583 (PMC5495495; doi:10.1371/journal.pone.0180583)
Supplement: S1 File — (XLSX) [file pone.0180583.s003.xlsx]

## Sheet: Sheet1
Name	Supporting single cell epigenome data (e.g. scATAC and Drop-ChIP)	Reads level QC	Individual cell level QC	Highly variable gene detection	Noise reduction	Informative cell selection	Cell clustering (sub cell type identification)	Differential expressed gene detection	Pseudotemporal ordering	Reference
Dr.seq2	✔	✔	✔	✔	✔	✔	✔	✔		-
Dr.seq		✔	✔	✔	✔	✔	✔	✔		Dr.seq: a quality control and analysis pipeline for droplet sequencing.
BASiCS				✔	✔		✔			BASiCS: Bayesian Analysis of Single-Cell Sequencing data.
scLVM				✔	✔			✔		Computational analysis of cell-to-cell heterogeneity in single-cell RNA-sequencing data reveals hidden subpopulations of cells
SINCERA		✔	✔	✔	✔		✔	✔		SINCERA: A Pipeline for Single-Cell RNA-Seq Profiling Analysis
OEFinder				✔	✔					OEFinder: a user interface to identify and visualize ordering effects in single-cell RNA-seq data
ZIFA					✔		✔			ZIFA: dimensionality reduction for zero-inflated single-cell gene expression analysis
Destiny					✔		✔			destiny: diffusion maps for large-scale single-cell data in R
SNN-Cliq					✔		✔			Identification of cell types from single-cell transcriptomes using a novel clustering method
RaceID					✔		✔	✔		Single-cell messenger RNA sequencing reveals rare intestinal cell types.
SCUBA					✔		✔	✔	✔	Bifurcation analysis of single-cell gene expression data reveals epigenetic landscape
BackSPIN							✔	✔		Cell types in the mouse cortex and hippocampus revealed by single-cell RNA-seq
PAGODA				✔	✔		✔			Characterizing transcriptional heterogeneity through pathway and gene set overdispersion analysis.
MAST								✔		MAST: a flexible statistical framework for assessing transcriptional changes and characterizing heterogeneity in single-cell RNA sequencing data.
SCDE							✔	✔		Bayesian approach to single-cell differential expression analysis
scDD								✔		A statistical approach for identifying differential distributions in single-cell RNA-seq experiments
Monocle									✔	The dynamics and regulators of cell fate decisions are revealed by pseudotemporal ordering of single cells.
Waterfall							✔		✔	Single-cell RNA-seq with Waterfall reveals molecular cascades underlying adult neurogenesis.
Sincell							✔		✔	Sincell: sn R/Bioconductor package for statistical assessment of cell-state hierarchies from single-cell RNA-seq
Oscope							✔		✔	Oscope identifies oscillatory genes in unsynchronized single-cell RNA-seq experiments
Wanderlust							✔		✔	Single-cell trajectory detection uncovers progression and regulatory coordination in human B cell development.
CellTree							✔		✔	CellTree: an R/bioconductor package to infer the hierarchical structure of cell populations from single-cell RNA-seq data
SinQC		✔	✔		✔					Quality control of single-cell RNA-seq by SinQC
ASAP					✔		✔	✔		ASAP: a Web-based platform for the analysis and inter-active visualization of single-cell RNA-seq data
